# Supplementary material
Source: PubMed Central journal article supplement (PMC5691406)
Supplement: AEM.01567-17_zam999118156s1.pdf [file AEM.01567-17_zam999118156s1.pdf]

**Table S1. Features of PR1 predicted CDSs.** For each CDS, the transcription strand, start and stop position is given. At protein level, the corresponding gene product size, molecular weight and pI as well as the homolog, predicted function, homology values and motifs are shown.

| ORF (+/-) | Start (bp) | Stop (bp) | Size (aa) | MW (Kda) | pI   | Best species hit <sup>a</sup>     | Putative function                                       | E-value (% identify) | Motifs                    | Homologous T5 ORF/T5p <sup>b</sup> |
|-----------|------------|-----------|-----------|----------|------|-----------------------------------|---------------------------------------------------------|----------------------|---------------------------|------------------------------------|
| 1/-       | 63         | 302       | 79        | 8.54     | 4.27 | -                                 | -                                                       | -                    | -                         | -                                  |
| 2/-       | 399        | 1,115     | 238       | 27.37    | 4.85 | <i>Yersinia</i> phage phiR201*    | deoxynucleoside-5'-monophosphatase ( <i>dmp</i> )       | 7E-71 (0.47)         | -                         | 001/001                            |
| 3/-       | 1,201      | 1,665     | 154       | 16.83    | 3.99 | -                                 | -                                                       | -                    | -                         | -                                  |
| 4/-       | 1,802      | 3,565     | 587       | 65.17    | 6.58 | <i>Escherichia</i> phage DT57C*   | DNA transfer protein A1                                 | 2E-164 (0.47)        | Metallophos_2: (PF12850)  | 004/004                            |
| 5/-       | 3,641      | 4,105     | 154       | 16.93    | 4.54 | <i>Escherichia</i> T5*            | DNA transfer protein A2                                 | 4E-8 (0.28)          | -                         | 007/006                            |
| 6/-       | 4,376      | 4,666     | 96        | 11.04    | 9.17 | -                                 | -                                                       | -                    | TPR                       | -                                  |
| 7/-       | 4,772      | 5,113     | 113       | 13.00    | 9.10 | -                                 | -                                                       | -                    | -                         | -                                  |
| 8/+       | 5,468      | 6,547     | 359       | 27.28    | 4.44 | <i>Pectobacterium</i> phage My1 * | hypothetical protein                                    | 7E-19 (0.39)         | -                         | 011_012/010                        |
| 9/+       | 6,596      | 6,997     | 133       | 15.03    | 6.49 | -                                 | -                                                       | -                    | -                         | -                                  |
| 10/+      | 7,181      | 7,297     | 38        | 4.26     | 3.17 | -                                 | -                                                       | -                    | 1 TMD                     | -                                  |
| 11/+      | 7,333      | 7,476     | 47        | 5.36     | 7.52 | -                                 | -                                                       | -                    | 1 TMD                     | -                                  |
| 12/+      | 7,548      | 7,820     | 90        | 10.65    | 4.19 | <i>Vibrio</i> phage 11895-B1      | hypothetical protein                                    | 9E-05 (0.74)         | -                         | -                                  |
| 13/+      | 7,907      | 8,335     | 142       | 15.72    | 4.19 | -                                 | -                                                       | -                    | -                         | -                                  |
| 14/+      | 8,579      | 8,848     | 89        | 9.63     | 8.47 | -                                 | -                                                       | -                    | -                         | -                                  |
| 15/+      | 8,910      | 9,041     | 43        | 5.20     | 9.89 | -                                 | -                                                       | -                    | -                         | -                                  |
| 16/+      | 9,105      | 9,335     | 76        | 8.42     | 4.13 | -                                 | -                                                       | -                    | -                         | -                                  |
| 17/+      | 10,551     | 10,694    | 47        | 5.56     | 4.56 | -                                 | -                                                       | -                    | -                         | -                                  |
| 18/-      | 11,044     | 11,940    | 298       | 33.54    | 7.64 | -                                 | -                                                       | -                    | -                         | -                                  |
| 19/-      | 11,986     | 12,687    | 233       | 26.54    | 4.73 | -                                 | -                                                       | -                    | -                         | -                                  |
| 20/-      | 12,885     | 13,181    | 98        | 11.61    | 5.91 | -                                 | -                                                       | -                    | -                         | -                                  |
| 21/-      | 13,295     | 13,513    | 72        | 7.90     | 0.41 | -                                 | -                                                       | -                    | 1 TMD; 1 SP               | -                                  |
| 22/-      | 13,510     | 13,782    | 90        | 9.06     | 4.31 | -                                 | -                                                       | -                    | -                         | -                                  |
| 22A/-     | 13,792     | 13,884    | 30        | 3.32     | 3.75 | -                                 | -                                                       | -                    | 1 TMD                     | -                                  |
| 23/-      | 13,887     | 14,516    | 209       | 23.84    | 5.36 | <i>Bacteroides</i> sp. CAG:875    | guanosine-3'5'-bis(Diphosphate) 3'-pyrophosphohydrolase | 1E-12 (0.34)         | HD_4: (PF13328)           | -                                  |
| 24/-      | 14,513     | 14,821    | 102       | 12.24    | 7.67 | -                                 | -                                                       | -                    | -                         | -                                  |
| 25/-      | 14,818     | 15,165    | 115       | 13.23    | 4.79 | -                                 | -                                                       | -                    | 1 TMD                     | -                                  |
| 26/-      | 15,177     | 15,509    | 110       | 12.55    | 0.26 | -                                 | -                                                       | -                    | -                         | -                                  |
| 27/-      | 15,516     | 15,842    | 108       | 11.98    | 3.97 | -                                 | -                                                       | -                    | -                         | -                                  |
| 28/-      | 15,832     | 16,023    | 63        | 7.10     | 4.41 | -                                 | -                                                       | -                    | -                         | -                                  |
| 29/-      | 16,005     | 16,361    | 118       | 14.01    | 10.0 | -                                 | -                                                       | -                    | 2 TMD                     | -                                  |
| 30/-      | 16,327     | 16,749    | 140       | 15.75    | 4.76 | -                                 | -                                                       | -                    | Acetyltransf_7: (PF13508) | -                                  |

|      |        |        |     |       |       |                                  |                                         |                   |                                                    |         |
|------|--------|--------|-----|-------|-------|----------------------------------|-----------------------------------------|-------------------|----------------------------------------------------|---------|
| 31/- | 16,746 | 17,039 | 97  | 11.12 | 5.13  | -                                | -                                       | -                 | -                                                  | -       |
| 32/- | 17,027 | 17,206 | 59  | 6.76  | 7.17  | -                                | -                                       | -                 | 1 TMD; 1 SP                                        | -       |
| 33/- | 17,314 | 17,559 | 81  | 8.90  | 10.15 | -                                | -                                       | -                 | 2 TMD; 1 SP                                        | -       |
| 34/- | 17,560 | 18,012 | 150 | 6.94  | 8.26  | <i>Pectobacterium</i> phage My1* | hypothetical protein                    | 8E-10<br>(0.45)   | -                                                  | 022/022 |
| 35/- | 17,969 | 18,424 | 151 | 17.31 | 4.31  | <i>Pectobacterium</i> phage My1* | hypothetical protein                    | 2E-18<br>(0.36)   | -                                                  | 024/025 |
| 36/- | 18,424 | 18,750 | 108 | 12.17 | 5.73  | -                                | -                                       | -                 | -                                                  | -       |
| 37/- | 18,754 | 19,122 | 122 | 13.80 | 8.43  | -                                | -                                       | -                 | 1 TMD                                              | -       |
| 38/- | 19,122 | 19,304 | 60  | 7.02  | 10.62 | -                                | -                                       | -                 | 1 SP                                               | -       |
| 39/- | 19,306 | 19,599 | 97  | 11.09 | 10.07 | -                                | -                                       | -                 | -                                                  | -       |
| 40/- | 19,674 | 20,042 | 122 | 14.15 | 4.67  | -                                | -                                       | -                 | -                                                  | -       |
| 41/- | 20,045 | 20,848 | 267 | 30.32 | 5.12  | <i>Salmonella</i> phage SPC35*   | serine/threonine protein phosphatase    | 1E-44<br>(0.37)   | Metallophos_2: (PF12850)                           | 031/034 |
| 42/- | 20,880 | 21,428 | 182 | 21.10 | 8.09  | <i>Escherichia</i> phage DT57C*  | phosphatase                             | 9E-36<br>(0.45)   | Metallophos_2: (PF12850)                           | 030/033 |
| 43/- | 21,431 | 21,583 | 50  | 5.81  | 3.50  | -                                | -                                       | -                 | Gly_radical: (PF01228)                             | -       |
| 44/- | 21,586 | 22,020 | 144 | 16.20 | 9.14  | <i>Vibrio</i> phage phi 3*       | phage protein                           | 0.00006<br>(0.31) | -                                                  | 034/037 |
| 45/- | 22,098 | 22,523 | 141 | 15.82 | 9.34  | <i>Klebsiella</i> phage KP27     | endolysin                               | 3E-34<br>(0.48)   | VanY: (PF02557)                                    | 036/039 |
| 46/- | 22,523 | 23,191 | 222 | 25.45 | 5.10  | <i>Pectobacterium</i> phage My1* | holin                                   | 3E-69<br>(0.48)   | Phage_holin_T: (PF11031); 1 TMD                    | 037/040 |
| 47/- | 23,358 | 24,062 | 234 | 25.96 | 4.34  | <i>Pectobacterium</i> phage My1* | Clp protease                            | 2E-42<br>(0.46)   | CLP_protease: (PF00574)                            | 038/041 |
| 48/- | 24,074 | 24,778 | 234 | 26.21 | 4.99  | <i>Escherichia</i> phage AKFV33* | Deoxynucleoside monophosphate kinase    | 1E-24<br>(0.36)   | P-mevalo_kinase: (PF04275)                         | 039/042 |
| 49/- | 24,768 | 25,091 | 107 | 12.27 | 8.29  | <i>Salmonella</i> phage STP4-a   | outer membrane lipoprotein, o-spanin    | 1E-13<br>(0.28)   | SpII cleavage site; Pilus_CpaD:<br>(PF09476); 1 SP | 040/043 |
| 50/- | 25,043 | 25,495 | 113 | 12.64 | 7.25  | <i>Escherichia</i> phage T5*     | cytoplasmic membrane protein, i-spanin  | 7E-13<br>(0.36)   | -                                                  | 041/044 |
| 51/- | 25,479 | 25,880 | 133 | 15.11 | 4.75  | -                                | -                                       | -                 | -                                                  | -       |
| 52/- | 25,870 | 26,115 | 81  | 8.86  | 11.21 | -                                | -                                       | -                 | 1 TMD                                              | -       |
| 53/- | 26,175 | 26,513 | 112 | 13.01 | 8.41  | -                                | -                                       | -                 | -                                                  | -       |
| 54/- | 26,696 | 27,187 | 163 | 17.85 | 4.10  | <i>Serratia</i>                  | radical cofactor pyruvate-formate lyase | 4E-36<br>(0.56)   | Gly_radical: (PF01228); 1 TMD                      | 054/055 |
| 55/- | 27,198 | 27,452 | 84  | 8.96  | 4.36  | -                                | -                                       | -                 | 1 SP                                               | -       |
| 56/- | 27,454 | 27,813 | 119 | 13.52 | 3.87  | -                                | -                                       | -                 | -                                                  | -       |
| 57/- | 27,816 | 28,367 | 183 | 20.12 | 7.51  | -                                | -                                       | -                 | AAA_14: (PF13173)                                  | -       |
| 58/- | 28,751 | 28,924 | 57  | 6.67  | 9.14  | -                                | -                                       | -                 | -                                                  | -       |
| 59/- | 28,933 | 29,121 | 62  | 7.14  | 9.51  | -                                | -                                       | -                 | 1 SP                                               | -       |
| 60/- | 29,259 | 29,372 | 37  | 4.33  | 5.41  | -                                | -                                       | -                 | -                                                  | -       |
| 61/- | 29,374 | 29,895 | 173 | 19.13 | 9.76  | <i>Escherichia</i> phage DT57C*  | DNA primase                             | 7E-25<br>(0.41)   | -                                                  | 071     |
| 62/- | 30,074 | 30,238 | 54  | 6.36  | 4.23  | -                                | -                                       | -                 | -                                                  | -       |

|       |        |        |     |       |       |                                  |                      |                   |                              |   |         |
|-------|--------|--------|-----|-------|-------|----------------------------------|----------------------|-------------------|------------------------------|---|---------|
| 63/-  | 30,404 | 30,694 | 96  | 11.34 | 4.29  | -                                | -                    | -                 | -                            | - | -       |
| 64/-  | 30,691 | 30,909 | 72  | 8.25  | 7.12  | -                                | -                    | -                 | -                            | - | -       |
| 65/-  | 31,002 | 31,553 | 183 | 21.73 | 4.22  | -                                | -                    | -                 | -                            | - | -       |
| 66/-  | 31,935 | 32,066 | 43  | 5.08  | 6.79  | -                                | -                    | -                 | -                            | - | -       |
| 67/-  | 32,150 | 32,317 | 55  | 5.57  | 10.13 | -                                | -                    | -                 | 2 TMD; 1 SP                  | - | -       |
| 68/-  | 32,415 | 32,726 | 103 | 12.13 | 7.75  | -                                | -                    | -                 | -                            | - | -       |
| 69/-  | 33,114 | 33,503 | 129 | 14.42 | 4.56  | -                                | -                    | -                 | -                            | - | -       |
| 70/-  | 33,503 | 33,688 | 61  | 6.92  | 5.74  | -                                | -                    | -                 | -                            | - | -       |
| 71/-  | 33,757 | 33,966 | 69  | 8.06  | 10.31 | -                                | -                    | -                 | -                            | - | -       |
| 72/-  | 34,051 | 34,374 | 107 | 12.71 | 8.78  | -                                | -                    | -                 | -                            | - | -       |
| 73/-  | 34,374 | 34,730 | 118 | 13.62 | 5.14  | <i>Yersinia</i> phage phiR1-37   | Hypothetical protein | 4E-15<br>(0.39)   | Response_reg: (PF00072)      | - | -       |
| 74/-  | 34,717 | 34,839 | 40  | 4.48  | 9.26  | -                                | -                    | -                 | 1 TMD                        | - | -       |
| 75/-  | 34,836 | 35,018 | 60  | 6.75  | 4.88  | -                                | -                    | -                 | -                            | - | -       |
| 76/-  | 35,906 | 36,082 | 58  | 6.64  | 7.08  | -                                | -                    | -                 | DnaJ_CXXCXGXG: (PF00684)     | - | -       |
| 77/-  | 36,254 | 36,400 | 48  | 5.72  | 10.01 | -                                | -                    | -                 | -                            | - | -       |
| 78/-  | 37,009 | 37,230 | 73  | 8.51  | 3.92  | -                                | -                    | -                 | -                            | - | -       |
| 79/-  | 37,312 | 37,461 | 49  | 5.53  | 6.62  | -                                | -                    | -                 | -                            | - | -       |
| 80/-  | 37,561 | 37,752 | 63  | 7.17  | 5.10  | -                                | -                    | -                 | -                            | - | -       |
| 81/-  | 37,797 | 38,270 | 157 | 18.25 | 3.97  | -                                | -                    | -                 | TPR                          | - | -       |
| 82/-  | 38,805 | 39,374 | 189 | 21.54 | 8.63  | <i>Erwinia</i> phage Ea35-70     | hypothetical protein | 9E-63<br>(0.55)   | LemA: (PF04011); 1 TMD; 1 SP | - | -       |
| 83/-  | 39,374 | 40,420 | 348 | 39.69 | 6.51  | <i>Erwinia</i> phage Ea35-70     | hypothetical protein | 7E-82 (0.4)       | 3 TMD; 1 SP                  | - | -       |
| 84/-  | 40,540 | 40,920 | 126 | 13.60 | 3.67  | -                                | -                    | -                 | -                            | - | -       |
| 85/-  | 40,996 | 41,361 | 121 | 13.75 | 3.82  | -                                | -                    | -                 | -                            | - | -       |
| 86/-  | 41,472 | 41,720 | 82  | 9.03  | 3.59  | -                                | -                    | -                 | -                            | - | -       |
| 87/-  | 41,799 | 42,197 | 132 | 14.69 | 3.97  | <i>Microgenomates</i> bacterium  | hypothetical protein | 2E-28<br>(0.46)   | -                            | - | -       |
| 88/+  | 42,601 | 42,864 | 87  | 10.15 | 10.50 | -                                | -                    | -                 | 1 TMD                        | - | -       |
| 89/-  | 42,938 | 43,222 | 94  | 10.74 | 6.26  | -                                | -                    | -                 | -                            | - | -       |
| 90/-  | 43,230 | 43,664 | 144 | 16.26 | 5.31  | <i>Salmonella</i> phage Shivani* | hypothetical protein | 8E-11<br>(0.36)   | GatB_Yqey: (PF02637)         | - | 076     |
| 91/-  | 43,666 | 44,103 | 145 | 16.53 | 9.54  | <i>Pectobacterium</i> phage My1* | cell wall hydrolase  | 8E-21<br>(0.39)   | SleB: (COG3773); 1 SP        | - | 078/081 |
| 92/-  | 44,103 | 44,480 | 125 | 13.83 | 10.22 | -                                | -                    | -                 | -                            | - | -       |
| 93/-  | 44,492 | 45,220 | 242 | 27.45 | 5.98  | <i>Escherichia</i> phage slur09* | hypothetical protein | 0.00003<br>(0.25) | RNase_T: (PF00929); 1 TMD    | - | 082/085 |
| 93A/- | 45,162 | 45,455 | 97  | 11.33 | 4.88  | <i>Pectobacterium</i> phage My1* | hypothetical protein | 0.00009<br>(0.47) | -                            | - | 083/086 |
| 94/-  | 45,406 | 45,783 | 125 | 14.55 | 11.19 | <i>Escherichia</i> phage T5*     | hypothetical protein | 0.000007          | -                            | - | 084/087 |
| 95/-  | 45,871 | 46,149 | 92  | 10.62 | 9.36  | <i>Pectobacterium</i> phage My1* | hypothetical protein | 3E-19<br>(0.58)   | -                            | - | 085/088 |

|       |        |        |     |        |       |                                           |                                                                           |                  |                                            |         |
|-------|--------|--------|-----|--------|-------|-------------------------------------------|---------------------------------------------------------------------------|------------------|--------------------------------------------|---------|
| 96/-  | 46,217 | 46,714 | 165 | 18.61  | 5.69  | <i>Cupriavidus</i> sp. BIS7               | ribonuclease HI                                                           | 2E-28<br>(0.44)  | RNase_H: (PF00075)                         | 086/089 |
| 97/-  | 46,714 | 47,010 | 98  | 10.83  | 4.02  | -                                         | -                                                                         | -                | -                                          | -       |
| 98/-  | 47,115 | 47,960 | 281 | 31.74  | 6.67  | <i>Idiomarina</i> <i>zobellii</i>         | thymidylate synthase                                                      | 1E-151<br>(0.73) | Thymidylat_synt: (PF00303)                 | 087/090 |
| 99/-  | 47,957 | 48,484 | 175 | 19.26  | 4.37  | <i>Salmonella</i> phage Stitch*           | dihydrofolate reductase, phage-associated                                 | 5E-12<br>(0.31)  | DHFR_1: (PF00186)                          | 088/091 |
| 100/- | 48,484 | 49,587 | 367 | 42.28  | 4.49  | <i>Salmonella</i> phage Shivani*          | ribonucleotide-diphosphate reductase class Ia<br>(aerobic), beta subunit  | 9E-126<br>(0.52) | -                                          | 089/092 |
| 101/- | 49,661 | 52,045 | 794 | 89.20  | 6.14  | <i>Escherichia</i> phage<br>vB_EcoS_FFH1* | ribonucleotide-diphosphate reductase class Ia<br>(aerobic), alpha subunit | 0.0 (0.58)       | Ribonuc_red_IgN: (PF00317)                 | 091/094 |
| 102/- | 52,173 | 52,892 | 239 | 26.96  | 8.91  | <i>Yersinia</i> phage phiR201*            | phosphate starvation-inducible protein <i>PhoH</i> ,<br>predicted ATPase  | 2E-101<br>(0.6)  | PhoH: PhoH-like prote: (PF02562)           | 092/096 |
| 103/+ | 53,186 | 55,057 | 623 | 70.09  | 5.86  | <i>Salmonella</i> phage Stitch*           | ribonucleotide reductase of class III (anaerobic),<br>large subunit       | 0.0 (0.73)       | NRDD: (PF13597)                            | 093/097 |
| 104/+ | 55,123 | 55,476 | 117 | 12.65  | 4.30  | -                                         | -                                                                         | -                | -                                          | -       |
| 105/+ | 55,469 | 55,681 | 70  | 7.82   | 4.10  | <i>Salmonella</i> phage FelixO1*          | hypothetical protein                                                      | 1E-15<br>(0.54)  | -                                          | 059/060 |
| 106/+ | 55,665 | 55,961 | 98  | 11.02  | 5.11  | -                                         | -                                                                         | -                | -                                          | -       |
| 107/+ | 55,961 | 56,260 | 99  | 11.50  | 4.39  | -                                         | -                                                                         | -                | -                                          | -       |
| 108/+ | 56,976 | 59,756 | 926 | 105.36 | 5.70  | <i>Salmonella</i> phage SPC35*            | replication origin binding protein                                        | 0.0 (0.65)       | Herpes_ori_bp: (PF02399)                   | 100/106 |
| 109/+ | 59,749 | 59,988 | 79  | 9.39   | 10.56 | -                                         | -                                                                         | -                | -                                          | -       |
| 110/+ | 60,046 | 60,765 | 239 | 27.28  | 5.54  | <i>Yersinia</i> phage phiR201*            | hypothetical protein                                                      | 8E-62<br>(0.48)  | HTH_Tnp_IS630: (PF01710)                   | 102/109 |
| 111/+ | 60,765 | 61,019 | 84  | 9.78   | 5.15  | -                                         | -                                                                         | -                | -                                          | -       |
| 112/+ | 61,096 | 61,494 | 132 | 14.21  | 5.36  | <i>Escherichia</i> phage T5*              | hypothetical protein                                                      | 6E-26<br>(0.46)  | -                                          | 104/111 |
| 113/+ | 61,507 | 61,836 | 109 | 12.56  | 9.49  | <i>Escherichia</i> phage DT57C*           | hypothetical protein                                                      | 3E-21<br>(0.48)  | -                                          | 105/112 |
| 114/+ | 61,877 | 62,170 | 97  | 11.11  | 4.76  | <i>Salmonella</i> phage Stitch*           | transcriptional regulator protein                                         | 5E-26<br>(0.52)  | PC4: Transcriptional (PF02229)             | 106/113 |
| 115/+ | 62,269 | 62,718 | 149 | 17.10  | 7.51  | -                                         | -                                                                         | -                | DNA_ligase_aden: (PF01653)                 | -       |
| 116/+ | 62,709 | 63,710 | 333 | 37.12  | 4.54  | <i>Yersinia</i> phage phiR201*            | DNA ligase                                                                | 3E-114<br>(0.55) | DNA_ligase_OB (PF03120)                    | 107/114 |
| 117/+ | 63,903 | 64,649 | 248 | 27.18  | 8.66  | <i>Escherichia</i> phage<br>vB_EcoS_FFH1* | DNA ligase subunit B                                                      | 4E-78<br>(0.55)  | Lig NAD-dependent DNA (COG0272)            | 108/115 |
| 118/+ | 64,656 | 65,444 | 262 | 28.55  | 6.33  | <i>Pectobacterium</i> phage My1*          | hypothetical protein                                                      | 3E-89<br>(0.58)  | Myb_DNA-bind_6: (PF13921)                  | 109/116 |
| 119/+ | 65,546 | 67,075 | 505 | 55.91  | 4.97  | <i>Yersinia</i> phage phiR201*            | DNA helicase                                                              | 8E-146<br>(0.47) | DnaB Replicative DNA helicase<br>(COG0305) | 110/117 |
| 120/+ | 67,072 | 67,950 | 292 | 32.63  | 6.05  | <i>Yersinia</i> phage phiR201*            | DNA replication primase                                                   | 4E-121<br>(0.59) | DnaG DNA primase (COG0358)                 | 112/119 |
| 121/+ | 68,023 | 69,831 | 875 | 69.08  | 5.71  | <i>Escherichia</i> phage<br>vB_EcoS_FFH1* | DNA polymerase exon                                                       | 0.0 (0.68)       | - SSL2 Superfamily II (COG1061)            | 113/120 |
| 122/+ | 70,092 | 70,877 | 261 | 30.22  | 8.42  | <i>Domibacillus</i> <i>tundrae</i>        | hypothetical protein                                                      | 8E-23<br>(0.35)  | LAGLIDADG_WhiA: (PF14527)                  | -       |
| 123/+ | 70,937 | 71,761 | 274 | 30.57  | 4.52  | <i>Yersinia</i> phage phiR201*            | DNA polymerase exon                                                       | 7E-105<br>(0.64) | DNA_pol_A: (PF00476)                       | 113/120 |
| 124/+ | 71,764 | 72,258 | 164 | 19.67  | 10.15 | <i>Salmonella</i> phage Stitch*           | hypothetical protein                                                      | 2E-41<br>(0.47)  | -                                          | 114/121 |

|       |         |         |      |        |      |                                           |                                                |                  |                                                      |         |
|-------|---------|---------|------|--------|------|-------------------------------------------|------------------------------------------------|------------------|------------------------------------------------------|---------|
| 125/+ | 72,255  | 73,631  | 458  | 52.00  | 6.68 | <i>Escherichia</i> phage DT57C*           | helicase                                       | 9E-162<br>(0.55) | SSL2 Superfamily II DNA or RNA<br>helicase (COG1061) | 115/122 |
| 126/+ | 73,663  | 73,917  | 84   | 9.89   | 4.24 | -                                         | -                                              | -                | -                                                    | -       |
| 127/+ | 73,985  | 74,359  | 124  | 14.52  | 4.71 | <i>Escherichia</i> phage AKFV33*          | hypothetical protein                           | 6E-32<br>(0.51)  | -                                                    | 116/123 |
| 128/+ | 74,346  | 75,164  | 272  | 30.50  | 4.90 | <i>Escherichia</i> phage DT57C*           | hypothetical protein                           | 2E-39<br>(0.36)  | -                                                    | 117/124 |
| 129/+ | 75,217  | 76,194  | 325  | 37.19  | 6.05 | <i>Pectobacterium</i> phage My1*          | exonuclease subunit 1                          | 1E-103<br>(0.5)  | -                                                    | 118/125 |
| 130/+ | 76,187  | 78,040  | 617  | 68.95  | 4.66 | <i>Escherichia</i> phage slur09*          | exonuclease subunit 2                          | 1E-168<br>(0.44) | -                                                    | 119/126 |
| 131/+ | 78,040  | 78,522  | 160  | 18.37  | 6.52 | <i>Escherichia</i> phage<br>vB_EcoS_FFH1* | hypothetical protein                           | 8E-71<br>(0.62)  | Hjc: (PF01870)                                       | 120/127 |
| 132/+ | 78,522  | 79,403  | 293  | 33.68  | 5.22 | <i>Escherichia</i> phage slur09*          | flap endonuclease                              | 1E-88<br>(0.49)  | 5_3_exonuc_N: (PF02739)                              | 121/128 |
| 133/+ | 79,396  | 79,860  | 154  | 16.89  | 5.92 | <i>Vibrio</i> phage phi 3*                | deoxyUTP pyrophosphatase                       | 3E-38<br>(0.44)  | dUTPase: (PF00692)                                   | 122/129 |
| 134/- | 79,901  | 82,180  | 759  | 81.40  | 6.82 | <i>Providencia</i> sneebia DSM<br>19967   | tail fiber protein (L-shapped fibers)          | 1E-71<br>(0.47)  | phage_tail_N: (PF08400)                              | 124/131 |
| 135/- | 82,180  | 82,593  | 137  | 15.12  | 4.92 | <i>Salmonella</i> phage Stitch*           | tail protein (L-fiber(tail tip collar))        | 2E-27<br>(0.42)  | -                                                    | 125/132 |
| 136/- | 82,598  | 85,714  | 1038 | 110.76 | 8.18 | <i>Salmonella</i> phage SPC35*            | tail protein (central straight fiber)          | 1E-173<br>(0.45) | -                                                    | 126/133 |
| 137/- | 85,707  | 88,550  | 947  | 106.77 | 5.80 | <i>Escherichia</i> phage AKFV33*          | tail protein                                   | 0.0 (0.57)       | Phage-tail_3: (PF13550)                              | 127/134 |
| 138/- | 88,551  | 89,159  | 202  | 22.50  | 5.80 | <i>Salmonella</i> phage SPC35*            | distal tail protein                            | 1E-72<br>(0.57)  | P22_CoatProtein: (PF11651)                           | 128/135 |
| 139/- | 89,276  | 92,989  | 1237 | 132.99 | 5.06 | <i>Salmonella</i> phage Stitch*           | tape measure protein                           | 0.0 (0.36)       | -                                                    | 129/136 |
| 140/- | 93,069  | 93,398  | 109  | 12.14  | 4.82 | <i>Pectobacterium</i> phage My1*          | hypothetical protein                           | 2E-17<br>(0.39)  | -                                                    | 131/138 |
| 141/- | 93,484  | 93,894  | 136  | 15.47  | 4.71 | <i>Pectobacterium</i> phage My1*          | hypothetical protein                           | 8E-34<br>(0.48)  | -                                                    | 132/139 |
| 142/- | 93,902  | 94,795  | 270  | 30.58  | 5.72 | <i>Escherichia</i> phage AKFV33*          | minor tail protein                             | 6E-56<br>(0.42)  | 1 TMD                                                | 133/140 |
| 143/- | 94,799  | 95,944  | 381  | 41.72  | 4.27 | <i>Salmonella</i> phage Stitch*           | major tail protein (tail tube protein)         | 9E-165<br>(0.6)  | -                                                    | 134/141 |
| 144/- | 95,970  | 96,455  | 161  | 18.45  | 5.04 | <i>Escherichia</i> phage DT57C*           | tail tube terminator protein                   | 2E-36<br>(0.41)  | Phage_tail_U: (PF06141)                              | 135/142 |
| 145/- | 96,455  | 97,216  | 253  | 28.01  | 9.97 | <i>Escherichia</i> phage EPS7*            | hypothetical protein                           | 3E-88<br>(0.55)  | -                                                    | 136/143 |
| 146/- | 97,216  | 97,734  | 172  | 19.80  | 5.26 | <i>Yersinia</i> phage phiR201*            | hypothetical protein                           | 9E-17 (0.3)      | -                                                    | 137/144 |
| 147/- | 97,800  | 99,227  | 475  | 52.09  | 5.04 | <i>Escherichia</i> phage slur09*          | major capsid protein                           | 8E-153<br>(0.56) | Phage_connect_1: (PF05135)                           | 138/145 |
| 148/- | 99,234  | 99,812  | 192  | 21.51  | 5.06 | <i>Escherichia</i> phage<br>vB_EcoS_FFH1* | prohead protease                               | 8E-74<br>(0.62)  | Phage_capsid: (PF05065)                              | 139/146 |
| 149/- | 99,809  | 101,020 | 403  | 44.10  | 4.38 | -                                         | -                                              | -                | Peptidase_S78: (PF04586)                             | -       |
| 150/- | 101,017 | 102,258 | 413  | 45.95  | 5.53 | <i>Yersinia</i> phage phiR201*            | portal protein                                 | 0.0 (0.63)       | Phage_portal: (PF04860)                              | 141/148 |
| 151/- | 102,258 | 102,761 | 167  | 19.54  | 6.96 | <i>Escherichia</i> phage slur09*          | putative nicking endonuclease, ( <i>SciA</i> ) | 1E-45<br>(0.68)  | HNH endonuclease: (PF01844)                          | 142/149 |
| 152/- | 102,941 | 104,263 | 440  | 50.57  | 5.35 | <i>Escherichia</i> phage DT57C*           | terminase large subunit                        | 0.0 (0.71)       | Terminase_3: (PF04466)                               | 144/151 |

|       |         |         |     |       |      |                            |                                                                               |                 |   |         |
|-------|---------|---------|-----|-------|------|----------------------------|-------------------------------------------------------------------------------|-----------------|---|---------|
| 153/- | 104,263 | 104,736 | 157 | 17.73 | 5.30 | <i>Vibrio</i> phage phi 3* | terminase, small subunit, single-chain interruption protein B ( <i>SciB</i> ) | 2E-36<br>(0.46) | - | 145/152 |
| 154/- | 104,746 | 106,611 | 621 | 67.73 | 9.40 | -                          | probable receptor binding protein (RBP)                                       | -               | - | -       |
| 155/+ | 106,776 | 107,294 | 172 | 19.95 | 5.67 | -                          | -                                                                             | -               | - | -       |

<sup>a</sup>Names of phages of *T5virus* genus are marked by an asterisk. The assignment of phages to the *T5virus* genus is based on Davison (2015) (1) or on taxonomic data in NCBI nucleotide database.

<sup>b</sup>The assignment of T5-encoded homologs to predicted PR1 proteins was based on results of BLASTP analysis against viral protein database. In the case of low homologies, putative T5-encoded counterparts of PR1 proteins (marked with an asterisk) were identified if they appeared as top hits (E value < -6) in a search against the translated DNA sequence of PR1 and a given T5 protein sequence as a query and if the relative location of their genes in the PR1 genome corresponded to that of a query gene in the genome of T5. The assignment of numbers to T5 ORFs/proteins is as in Wang et al. 2005/Zivanovic et al., 2014 (2, 3). Functional assignments of PR1 genes encoding homologs of T5 morphogenetic proteins are as in Zivanovic et al., 2014 (2). Acronyms: TMD – transmembrane domain; SP – Signal peptide; TPR P – tetra tri copeptide repeat motif.

**Table S2. tRNA genes and codon usage of PR1.** The anti-codon for which each tRNA (anti-codon) matches is highlighted in bold.

| tRNA | Amino acid | Phage codon and frequency (%) |              |            |             |     |     | Anti-codon | Size (bp) | GC %   | Start  | End    |        |
|------|------------|-------------------------------|--------------|------------|-------------|-----|-----|------------|-----------|--------|--------|--------|--------|
| 1    | Met        | <b>ATG</b>                    |              |            |             |     |     | CAT        | 73        | 53.2   | 28,388 | 28,460 |        |
| 2    | Gln        | GAG* <b>GAA</b>               |              |            |             |     |     | TTG        | 73        | 54.8   | 28,591 | 28,663 |        |
|      |            | 818 <b>1,547</b>              |              |            |             |     |     |            |           |        |        |        |        |
| 3    | Trp        | <b>TGG</b>                    |              |            |             |     |     | CCA        | 71        | 54.9   | 30,930 | 31,000 |        |
|      |            | <b>416</b>                    |              |            |             |     |     |            |           |        |        |        |        |
| 4    | Leu        | TTG                           | TTA          | CTG        | <b>CTA*</b> | CTT | CTC | TAG        | 74        | 50.0   | 31,862 | 31,935 |        |
|      |            | 295                           | 1,069        | 272        | <b>780</b>  | 461 | 90  |            |           |        |        |        |        |
| 5    | Leu        | TTG                           | <b>TTA</b>   | CTG        | <b>CTA*</b> | CTT | CTC | TAA        | 74        | 52.7   | 32,075 | 32,148 |        |
|      |            | 295                           | <b>1,069</b> | 272        | 780         | 461 | 90  |            |           |        |        |        |        |
| 6    | Cys        | TGT* <b>TGC</b>               |              |            |             |     |     |            | GCA       | 71     | 46.5   | 32,337 | 32,407 |
|      |            | 210 <b>107</b>                |              |            |             |     |     |            |           |        |        |        |        |
| 7    | Asn        | AAT                           | <b>AAC*</b>  |            |             |     | GTT | 82         | 52.4      | 35,041 | 35,122 |        |        |
|      |            | 918 <b>717</b>                |              |            |             |     |     |            |           |        |        |        |        |
| 8    | Ile        | ATA* ATT                      | <b>ATC</b>   |            |             |     | GAT | 74         | 51.3      | 35,132 | 35,205 |        |        |
|      |            | 537 1,014                     | <b>626</b>   |            |             |     |     |            |           |        |        |        |        |
| 9    | Glu        | GAG* <b>GAA</b>               |              |            |             |     |     |            | TTC       | 75     | 49.3   | 35,511 | 35,585 |
|      |            | 818 <b>1,547</b>              |              |            |             |     |     |            |           |        |        |        |        |
| 10   | Tyr        | TAT <b>TAC*</b>               |              |            |             |     |     |            | GTA       | 82     | 54.9   | 35,669 | 35,750 |
|      |            | 709 <b>514</b>                |              |            |             |     |     |            |           |        |        |        |        |
| 11   | Arg        | AGG* AGA                      | CGG          | CGA        | <b>CGT</b>  | CGC | ACG | 73         | 49.3      | 35,843 | 35,915 |        |        |
|      |            | 133 447                       | 32 145       | <b>564</b> | 157         |     |     |            |           |        |        |        |        |
| 12   | Thr        | ACG <b>ACA*</b>               | ACT          | ACC        |             |     |     | TGT        | 73        | 53.4   | 36,101 | 36,173 |        |
|      |            | 185 <b>655</b>                | 879 271      |            |             |     |     |            |           |        |        |        |        |
| 13   | Val        | GTG <b>GTA*</b>               | GTT          | GTC        |             |     |     | TAC        | 71        | 49.2   | 36,182 | 36,252 |        |
|      |            | 283 <b>913</b>                | 901 157      |            |             |     |     |            |           |        |        |        |        |
| 14   | His        | CAT <b>CAC*</b>               |              |            |             |     |     |            | GTG       | 75     | 56.0   | 36,481 | 36,555 |
|      |            | 398 <b>225</b>                |              |            |             |     |     |            |           |        |        |        |        |
| 15   | Phe        | TTT <b>TTC*</b>               |              |            |             |     |     |            | GAA       | 72     | 50.0   | 36,699 | 36,770 |
|      |            | 800 <b>559</b>                |              |            |             |     |     |            |           |        |        |        |        |
| 16   | Asp        | GAT <b>GAC*</b>               |              |            |             |     |     |            | GTC       | 74     | 55.4   | 36,779 | 36,852 |
|      |            | 1,398 <b>704</b>              |              |            |             |     |     |            |           |        |        |        |        |
| 17   | Ala        | GCG* <b>GCA</b>               | GCT          | GCC        |             |     |     | TGC        | 73        | 50.7   | 36,862 | 36,934 |        |
|      |            | 264 <b>969</b>                | 1,070 243    |            |             |     |     |            |           |        |        |        |        |
| 18   | Pro        | CCG <b>CCA</b>                | CCT          | CCC*       |             |     |     | TGG        | 74        | 51.3   | 36,945 | 37,018 |        |
|      |            | 122 <b>525</b>                | 474 165      |            |             |     |     |            |           |        |        |        |        |
| 19   | Ser        | AGT <b>AGC</b>                | TCC*         | TCT        | TCC*        | TCA | GCT | 91         | 50.5      | 37,480 | 37,570 |        |        |
|      |            | 445 <b>268</b>                | 113 714      | 208 463    |             |     |     |            |           |        |        |        |        |
| 20   | Lys        | AAG* <b>AAA</b>               |              |            |             |     |     |            | TTT       | 73     | 49.3   | 38,291 | 38,363 |
|      |            | 858 <b>1,363</b>              |              |            |             |     |     |            |           |        |        |        |        |
| 21   | Met        | <b>ATG</b>                    |              |            |             |     |     | CAT        | 73        | 56.2   | 40,459 | 40,531 |        |
|      |            | <b>100</b>                    |              |            |             |     |     |            |           |        |        |        |        |
| 22   | Arg        | AGG* <b>AGA</b>               | CGG          | CGA        | CGT         | CGC | TCT | 72         | 47.2      | 41,393 | 41,464 |        |        |
|      |            | 133 <b>447</b>                | 32 145       | 564 157    |             |     |     |            |           |        |        |        |        |

\*less frequent *Providencia rettgeri* codons consulted at the Codon Usage Database (Kazusa DNA Research Institute, Japan)

**Table S3. Location and nucleotide sequence of nick regions in PR1 DNA.**

| Nick name              | Sequence in nicked 3'-5' strand (5'-3') <sup>a</sup> | Nick location in the genome |                              |                                | Fraction of phage DNA with a nick <sup>e</sup> |
|------------------------|------------------------------------------------------|-----------------------------|------------------------------|--------------------------------|------------------------------------------------|
|                        |                                                      | position <sup>b</sup>       | % genome length <sup>c</sup> | relative location <sup>d</sup> |                                                |
| nick 1 (major)         | A/ <u>GCGCAGAG</u>                                   | 9699/                       | 8.2                          | NC, CDS16/CDS17*               | 45%                                            |
| nick 2                 | G/ <u>GCGCAGGA</u>                                   | 26607/                      | 22.4                         | NC, CDS54/CDS55                | 31%                                            |
| nick 3                 | G/ <u>GCGCAGGA</u>                                   | 37780/                      | 31.9                         | NC, CDS80/CDS81                | 24%                                            |
| nick 4                 | G/ <u>GCGCAGGA</u>                                   | 52111/                      | 44.0                         | NC, CDS101/CDS102              | 39%                                            |
| nick 5                 | G/ <u>GCGCACGA</u>                                   | 67548/                      | 57.0                         | CDS120 (DNA primase)           | 26%                                            |
| nick 6                 | G/ <u>GCGCATAA</u>                                   | 88044/                      | 74.3                         | CDS137                         | 41%                                            |
| nick 7                 | G/ <u>GCGCGATA</u>                                   | 97564/                      | 82.3                         | CDS146                         | 21%                                            |
| nick 8                 | G/ <u>GCGCATGG</u>                                   | 103262/                     | 87.1                         | CDS152 (terminase)             | 22%                                            |
| nick 9 (major)         | A/ <u>GCGCAGAG</u>                                   | 117775/                     | 99.4                         | NC, CDS16/CDS17*               | 45%                                            |
| consensus <sup>f</sup> | R/ <u>GCGC</u> RNDR                                  |                             |                              |                                |                                                |

<sup>a</sup> Sequences of nick regions represent the sequences in 3'-5' strand where the nicks are located. Nucleotide residues conserved in all nick regions are underlined.

<sup>b</sup> Nick position is shown relative to the corresponding position in 5'-3' strand

<sup>c</sup> The % of genome length where a nick is located is calculated from the beginning of left LTR

<sup>d</sup> NC stands for non-coding region, nicks in the redundant PR1 virion DNA regions (LTRs) are indicated by an asterisk

<sup>e</sup> The fraction of phage DNA with a nick was estimated based on the number of sequence reads that start from the nick site as compared to the number of reads that start from the nick site plus the number of reads that span the nick site

<sup>f</sup> Alternative nucleotides in the consensus sequence are represented by IUPAC ambiguity code symbols, where V= A or C or G, N = any nucleotide residue, D= A or G or T, R = A or G, sequences of nick regions represent the sequences in 3'-5' strand where the nicks are located





**Figure S1. Confirmation of PR1 virion DNA end sequences.** Chromatograms represent the results of Sanger sequencing of PR1 virion LTR ends with the use of primer complementary to the lower strand of L-LTR (OMLO811, right panel) or to the upper strand of R-LTR (OMLO810, left panel). The crossed picks represent so called „glorious A” - a single false A nucleotide that is added at the physical end of DNA fragment by the sequencing DNA polymerase and does not represent any real sequence. Capital letters below the chromatograms represent redundant sequences at ends of LTRs, while small letters represent non-redundant genome parts at one border of each LTR. Regions matching to primers are shown schematically above the chromatograms at the scheme of PR1 virion DNA.

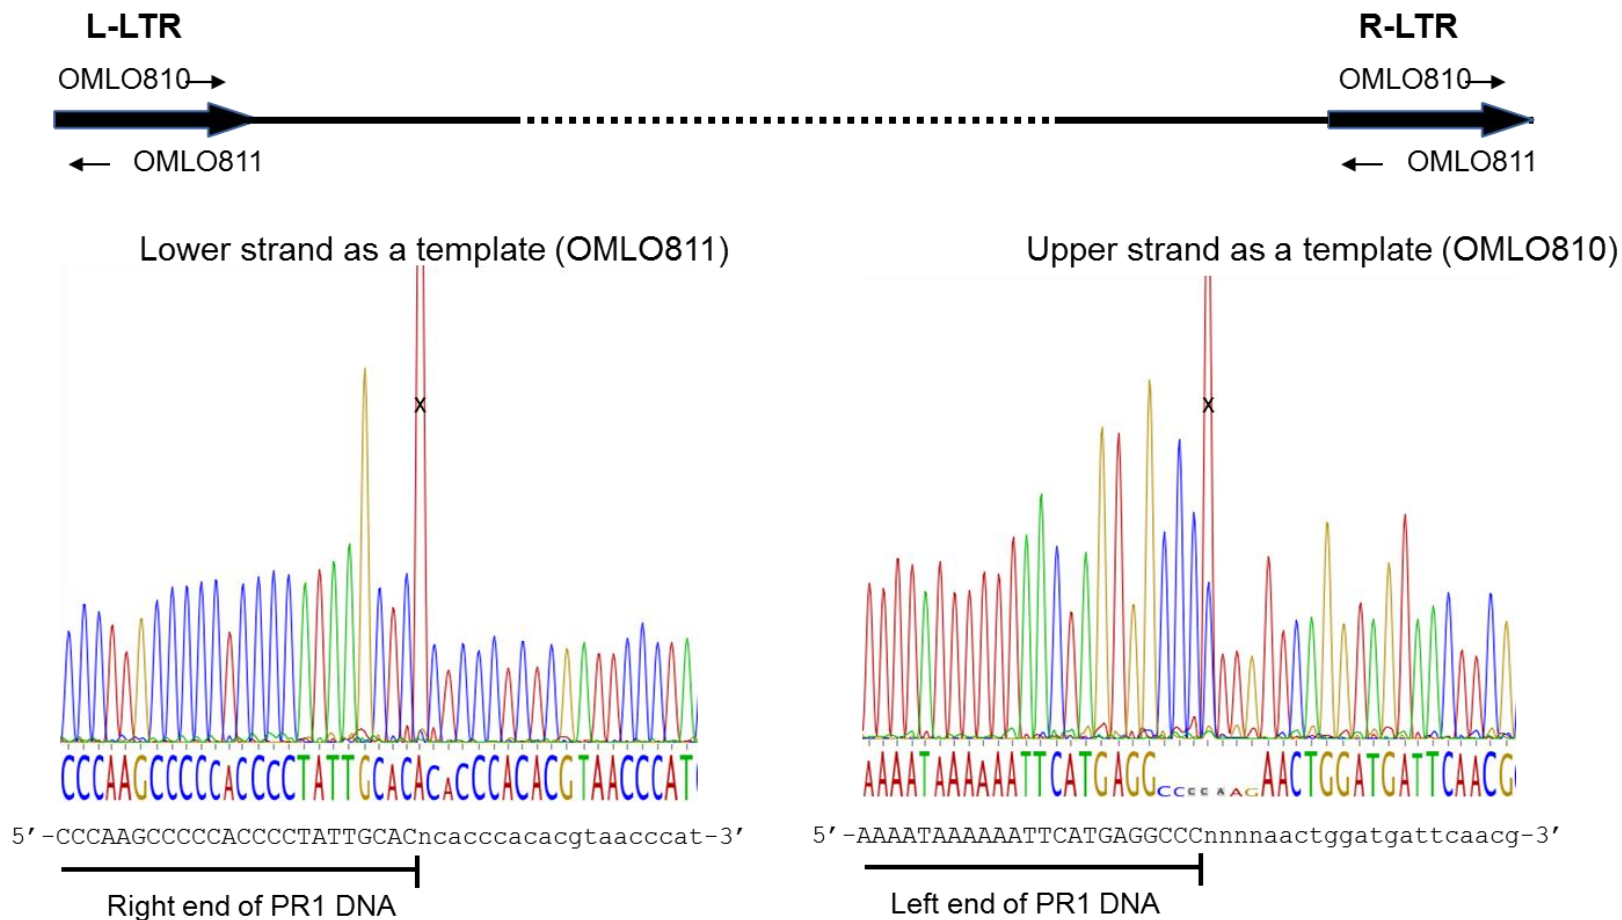

**Figure S2. Analysis of the selected nick regions in PR1 virion DNA.** Chromatograms represent the results of Sanger sequencing of nick region 1 and 9 (left panel) and 6 (right panel) with the use of primers complementary to the upper (OMLO812 and OMLO814, respectively) or to the lower strand (OMLO813 and OMLO815, respectively) of the virion DNA. The crossed picks represent the so called „glorious A” - a single false A nucleotide that is added at the physical end of DNA fragment by the sequencing DNA polymerase and does not represent any real sequence. The numbering of nicks is as in Table S4. Sequences of primers are listed in the Materials and Methods section.

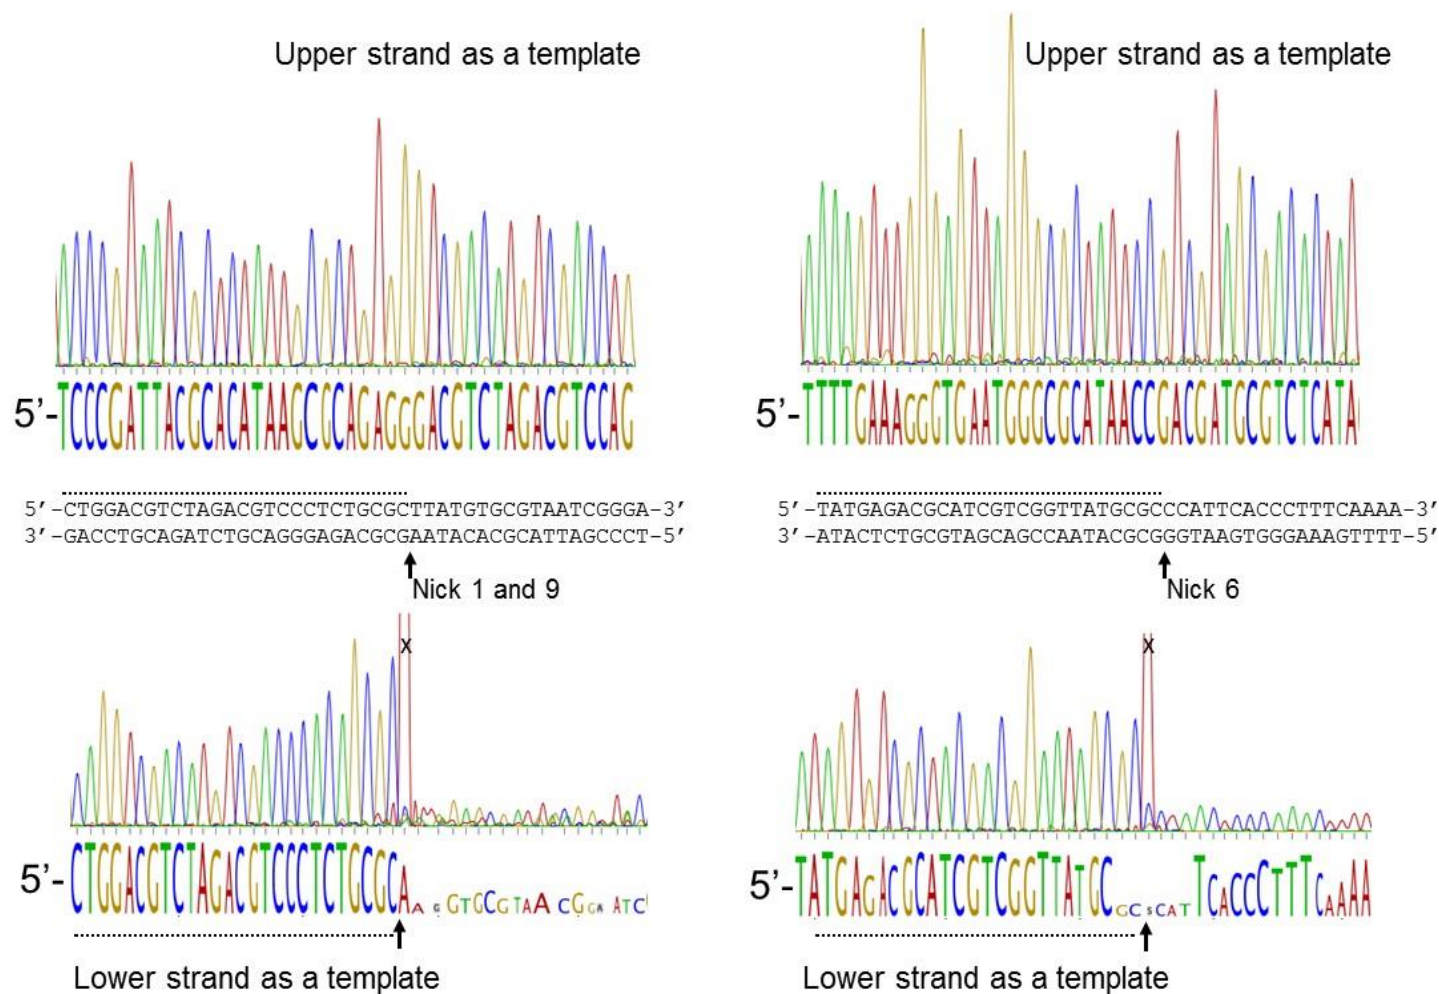

**Figure S3. Orthologous clusters in *T5virus*.** Comparisons of orthologous clusters of *T5virus* with *Providencia* virus PR1 (encoding 157 CDSs). The following *T5virus* were included: *Escherichia* virus T5 (encoding 157 CDSs), *Escherichia* virus AKFV33 (encoding 162 CDSs), *Escherichia* virus DT57C (encoding 132 CDSs), *Salmonella* virus Stitch (encoding 165 CDSs) and *Salmonella* virus Shivani (encoding 154 CDSs). Gene products at the terminal repeats were only considered once, for easy of interpretation of intra and interspecies protein relationships. The orthologous clusters were conducted using OrthoVenn server which only allows a maximum number 6 species to be analysed.

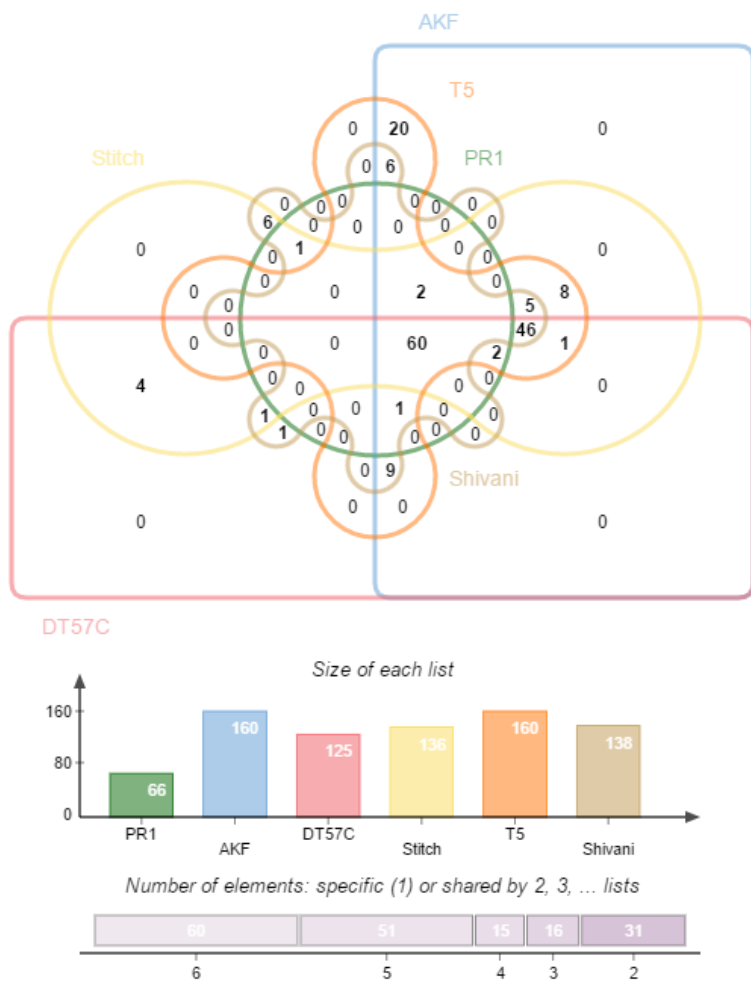

**Figure S4. Phylogenetic analysis of phage proteins.** DNA polymerase, major capsid protein, tail measure protein and large terminase subunit of PR1 homologs identified using BLASTp in GenBank and phages were used to generate phylogenetic trees using the "one click" mode at phylogeny.fr. The trees were exported in Newick format and tree produced using FigTree.

A. DNA polymerase

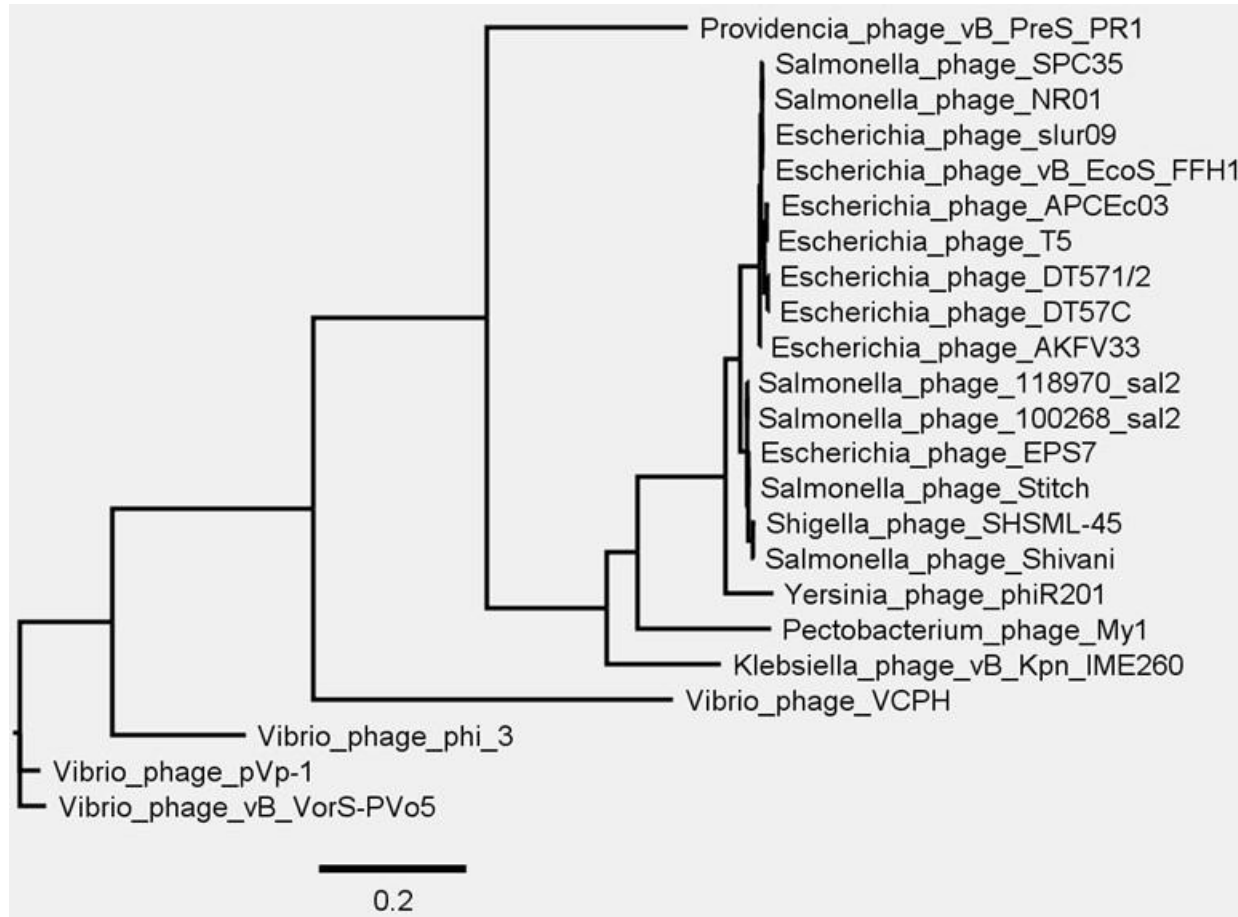

B. Major capsid protein

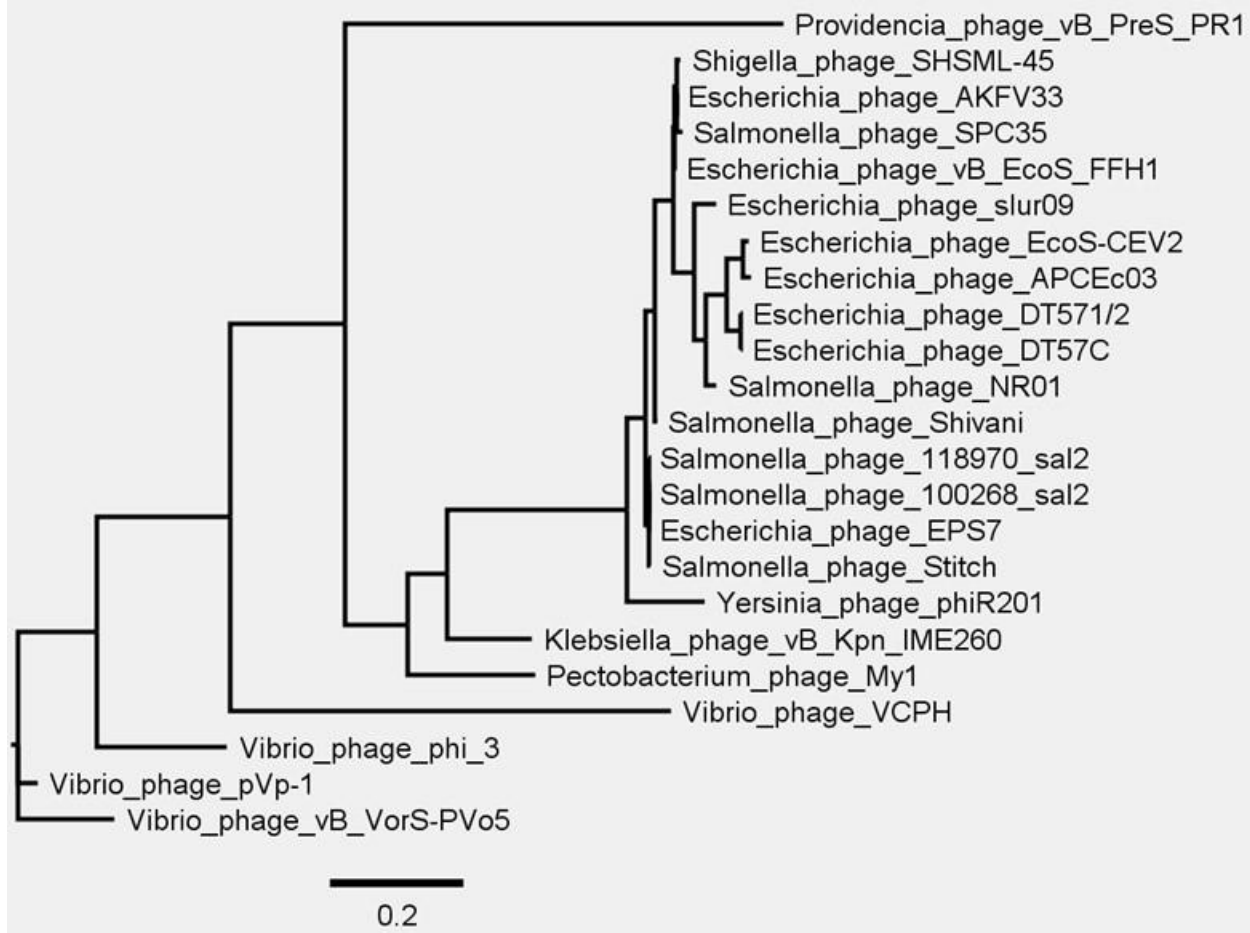

C. Major tail protein

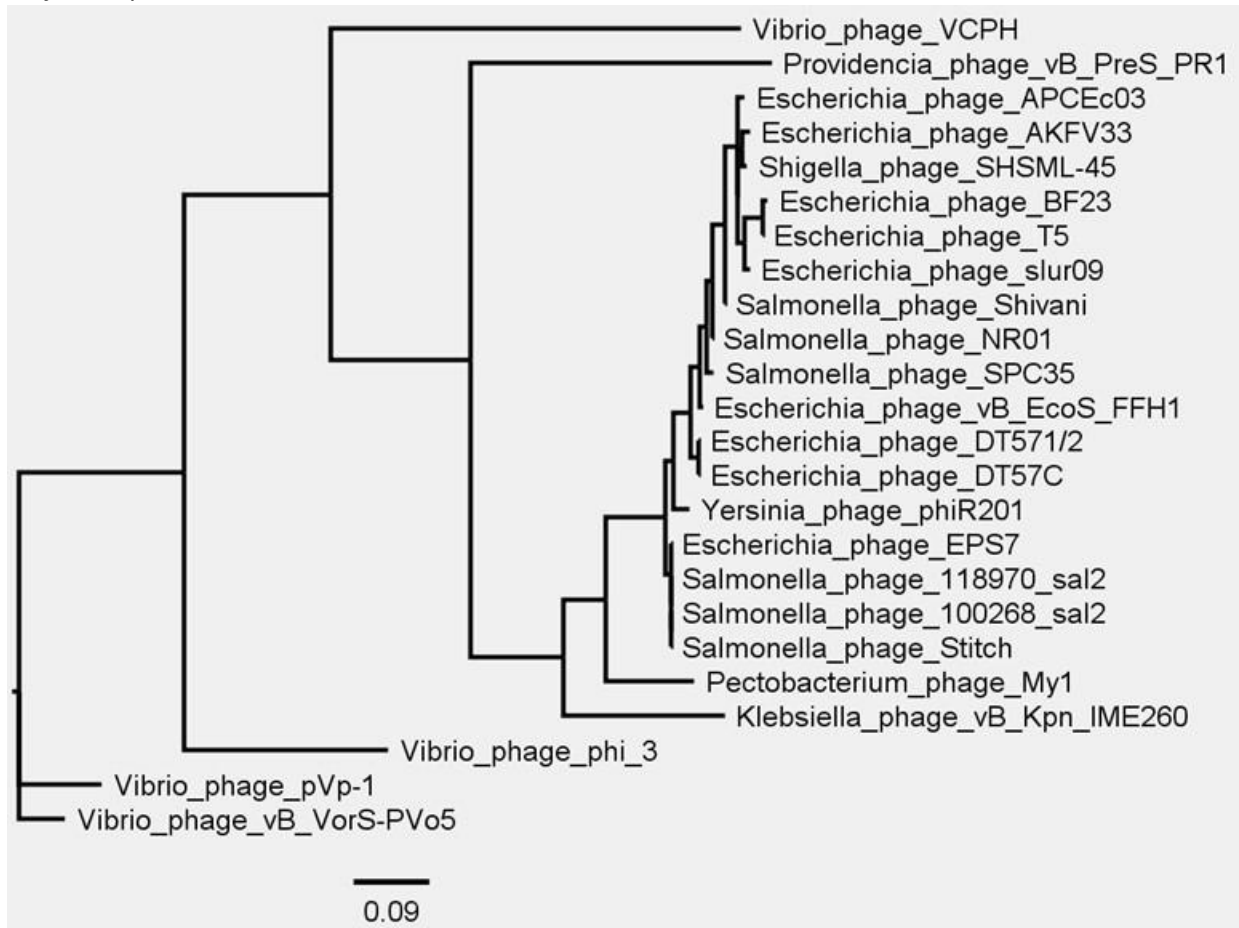

D. Terminase, large subunit

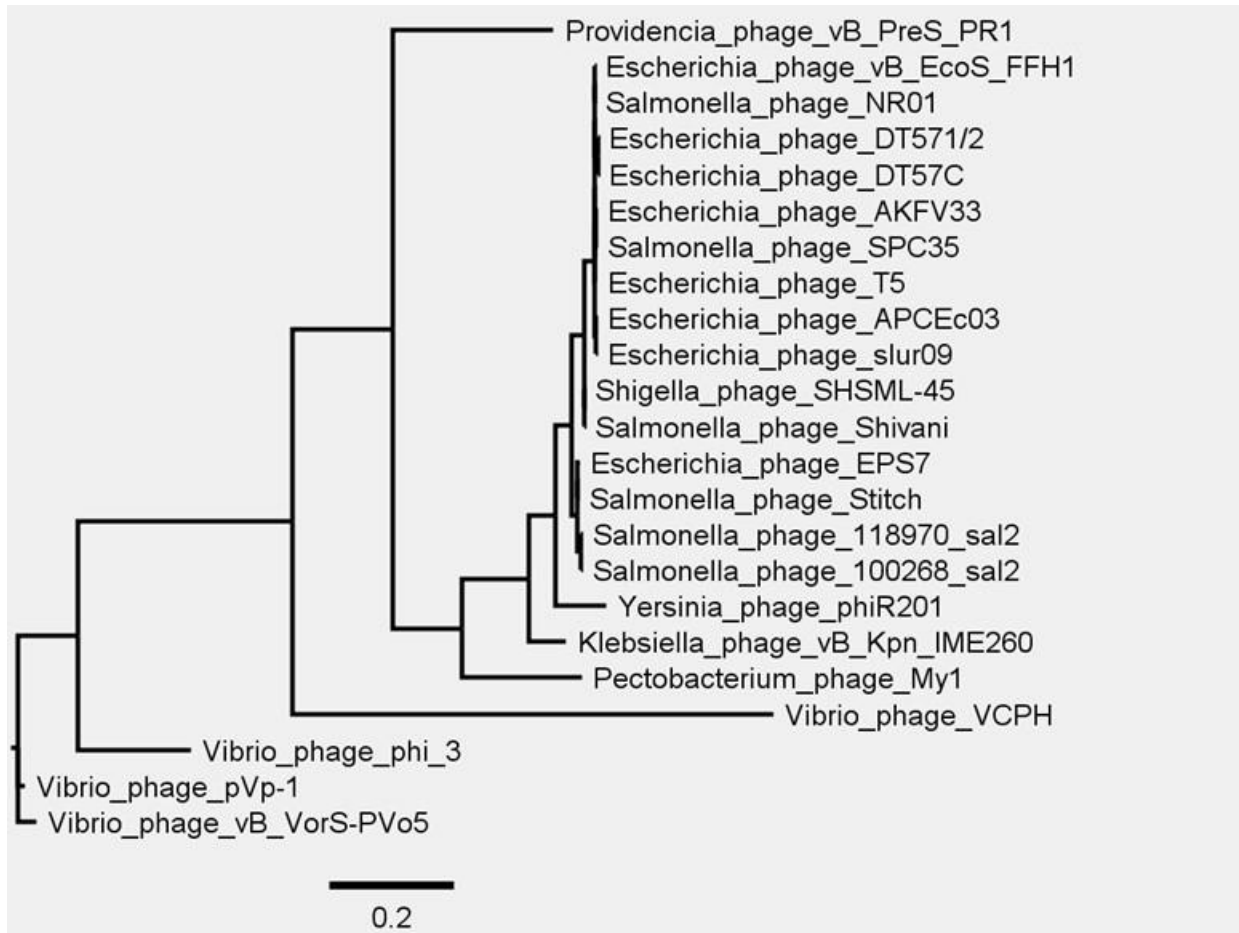



## References

1. Davison J. 2015. Pre-early functions of bacteriophage T5 and its relatives. *Bacteriophage* 5:e1086500.
2. Zivanovic Y, Confalonieri F, Ponchon L, Lurz R, Chami M, Flayhan A, Renouard M, Huet A, Decottignies P, Davidson AR, Breyton C, Boulanger P. 2014. Insights into Bacteriophage T5 Structure from Analysis of Its Morphogenesis Genes and Protein Components. *J Virol* 88:1162-1174.
3. Wang J, Jiang Y, Vincent M, Sun Y, Yu H, Bao Q, Kong H, Hu S. 2005. Complete genome sequence of bacteriophage T5. *Virology* 332:45-65.
